# Towards a potential landscape framework of microbiome dynamics

William K. Chang<sup>1</sup>, Dave VanInsberghe<sup>2</sup>, and Libusha Kelly<sup>1</sup>

<sup>1</sup>Systems and Computational Biology Department, Albert Einstein College of Medicine

<sup>2</sup>Department of Environmental and Civil Engineering, Massachusetts Institute of Technology

November 14, 2019

## Abstract

Microbiome dynamics influence the health and functioning of human physiology and the environment. These dynamics are driven in part by interactions between large numbers of microbial taxa, making large-scale prediction and modeling a challenge. Here, we identify states and dynamical features relevant to macroscopic processes, such as infection in the human body and geochemical cycling in the oceans, by modeling the dynamics as stochastic motion on a potential energy-like landscape. We show that gut disease processes and marine geochemical events are associated with reproducible transitions between community states, defined as topological features of the landscape. We find a reproducible two-state succession during recovery from cholera in the gut microbiomes of multiple patients. Recurrence of the late disease state prolongs disease duration. We find evidence of dynamic stability in the gut microbiome of a human subject after experiencing diarrhea during travel, in contrast to residual instability in a second human subject after clinical recovery from *Salmonella* infection. Finally, we find the structure of marine *Prochlorococcus* communities in the western Atlantic and north Pacific oceans to smoothly vary with temperature and depth. However, annual water column cycling in the Atlantic drives periodic state transitions across depths. Our approach bridges the small-scale fluctuations in microbiome composition and large-scale changes in state and phenotype, improves analyses of how changes in community composition associate with phenotype without requiring experimental characterization of underlying mechanisms, and provides a novel assessment of microbiome stability and its relation to human and environmental health.

## Importance

Time series of microbial communities are difficult to analyze due to the large number of interacting taxa. We developed a novel analysis based on topology to detect compositional states and state transitions in microbial time series. Our method generalizes across biological systems and can identify gut microbiome dynamics associated with recovery from disease in multiple patients on the order of weeks, and marine bacterial dynamics driven by geochemical cycling on the order of years. We furthermore propose a novel definition of ecological stability that distinguishes between complete and incomplete recovery from infection in human gut microbiomes. Our method requires minimal assumptions regarding biological mechanisms. Overall, our analysis complements current methods for identifying key ecological processes in microbial communities, and suggests further developments in modeling that may improve prediction of microbial dynamics.

## Introduction

Complex microbial ecosystems ('microbiomes') inhabit a diversity of environments in the biosphere, including the global ocean [42], soil [12], and the human gut [43]. Large-scale alterations in the composition of microbiomes is often associated, whether as driver or consequence, with environmental processes such as seasonal geological cycling and nutrient fluctuations [14]; physiological processes

45 such as menstrual cycles [15]; and clinical phenotypes such as irritable bowel syndrome [3]. Anal-  
46 ysis and prediction of the large-scale dynamics of microbiome composition is thus a pressing issue  
47 in multiple fields of study.

48 As with many biological systems, understanding of the dynamics of microbiomes is complicated  
49 by their high dimensionality. Numerous variables define the state of a microbiome; these include  
50 frequencies of microbial taxa and their genetic alleles, which are decoupled due to genomic plasticity  
51 and horizontal gene transfer [31, 32], and environmental conditions such as temperature, pH, and  
52 biochemical concentrations. A microbiome thus has a vast number of potential configurations in  
53 which it may, in principle, fluctuate on a short time scale. By contrast, systemic phenotypes, such  
54 as human gut infections or aquatic algal blooms, persist for much longer than bacterial generation  
55 time, and community compositions may be diverse within a phenotype [14]. Furthermore, due  
56 to the diverse biology of microbiomes across habitats, it may be desirable to have a quantitative  
57 framework that can be generalized across biological systems.

58 One approach to analyzing microbiome dynamics has been to infer the network of underlying  
59 pairwise interactions between taxa by calculating the inverse covariance matrix from time series  
60 data, often as a basis for modeling population dynamics using Lotka-Volterra equations [13, 25,  
61 41]. Such approaches are useful for predicting fine-grained taxon-taxon interactions of importance,  
62 and are challenged by the compositional nature of microbiome data [39] and possible role of higher-  
63 order interactions [4]. A complementary coarse-grained approach is to cluster samples according  
64 to compositional similarity, and conceptualize dynamics as stochastic transitions between clusters  
65 [2, 9]. Such approaches can be used to identify large-scale shifts in compositional state, with the  
66 implicit assumption that each temporal sample can be assigned to one of a finite number of discrete  
67 categories.

68 We propose to supplement these methods with a *potential landscape* approach. Potential land-  
69 scapes provide a framework for modeling the dynamics of high-dimensional, complex systems such  
70 as microbiomes by representing the configurations of a dynamical system—here, the possible com-  
71 positions of a microbiome—as coordinates in phase space, where similar configurations are located  
72 close together. The system dynamics are considered as stochastic motion on the resultant manifold,  
73 with topological features corresponding to the probable configurations of the system and trajec-  
74 tories between them. Features of the potential landscape, such as valleys and peaks, represent  
75 more and less probable compositional states, respectively, and are related to notions of attractors  
76 and basins of attraction in dynamical systems theory. This approach predicts that, over time,  
77 the system evolves along the contours of the landscape towards a local minimum of the potential;  
78 thus, the shape of the landscape in principle predicts the dynamics. Thus, the landscape encodes  
79 the underlying interactions between components, in our case microbial taxa, without explicit as-  
80 sumptions regarding underlying biological mechanisms (Fig. 1A). In biology, attractors and basins  
81 of attraction have been found in theoretical and experimental studies to correspond to states of  
82 population survival and extinction [6, 7, 35]; cell phenotypes in differentiating stem cells [44, 46]  
83 and transformed cancer cells [23, 27]; and probable states of brain activity [19]. These results show  
84 that topological features of the potential landscape can be thought of as metastable states asso-  
85 ciated with phenotypes of biological and clinical relevance as well as the dynamics of phenotypic  
86 transitions, and that revealing the potential landscape may have implications for modeling and  
87 predicting the dynamics of complex biological systems. Similarly to clustering, the composition  
88 can be approximated by the metastable state or states to which it belongs at a given time, and  
89 the trajectory of the system in phase space over time can be approximated by a succession of  
90 such states. However, it is important to note that this definition of system states derives from an  
91 underlying continuous potential landscape, and thus differs from clustering methods.

92 To characterize features of the microbial potential landscape, we used topological data analysis  
93 (TDA), specifically the Mapper algorithm [34, 40] to infer the topological features of the potential  
94 landscapes for three published microbial time series data sets, two human gut microbiomes—one of  
95 stool samples collected from seven cholera patients from disease through recovery [22], one from two  
96 mostly healthy adult males [8]—and one of marine *Prochlorococcus* communities spanning multiple  
97 depths collected from one site in the Atlantic Ocean (BATS) and one in the Pacific (HOT) [28]. We  
98 selected these data sets in part to test our method by recapitulating biology known from the original  
99 studies, and in part to discover novel features not addressed by prior methods. Briefly, Mapper  
100 represents the underlying distribution of data in a metric space as an undirected graph, where  
101 each vertex comprises a non-exclusive subset of data points spanning a patch of phase space. An  
102 edge is drawn between each two vertices that share at least one data point (Fig. 1A), representing

connectivity between patches. We complement Mapper with a novel graph-theoretical analysis to estimate the value of the potential over each patch of phase space represented by a vertex, determine local minima, and define metastable community states (Fig. 1B). In both human gut and marine systems, we find that significant physiological and environmental events, including recovery from infection and geochemical cycling, correspond to recurrent successions of state transitions. We show that these successions are an informative coarse-grained view of microbiome dynamics, with implications for the assessment of ecological resilience.

## Results

### Dynamics of human gut microbiome recovery from cholera infection

We found the cholera phase space to be partitioned by clinical phenotype, i.e. diarrhea or recovery (Fig. 2A). The original study [22] recognized phases of progression according to equal-time divisions of the diarrhea and recovery periods, respectively, of each patient. Our identification of disease substates, in contrast, is based on community composition and integrated across data from all patients. We found the diarrhea region was further subdivided into two states, 2 and 7 (Fig. 2B). Patients C, E, and G occupied state 7 for prolonged durations immediately before clinical recovery; patients A, B, and F stably occupied state 7 for approximately 20 hours, but switched to other states for the last few time points before clinical recovery (Fig. 2C). In the case of patient A, the final few time points were associated with state 5, which represented an intermediate region of the phase space between the diarrhea- and recovery-associated neighborhoods. These results suggest that state 2 constituted a universal ‘early’ diarrhea state, and state 7 a universal ‘late’ diarrhea state, with distinct community compositions. The original study noted taxa which consistently changed in abundance between the start and end of the diarrhea phase, for example *Streptococcus* and *Fusobacterium* [22], here we show that these compositional shifts are observable on the whole-community scale.

Generally, patients occupied state 7 for longer than they did state 2, suggesting that the stability of the late state in a given patient influences disease duration. To quantify stability, we calculated a temporal correlation function for each state-patient pair during the diarrhea phase. Monotonically decreasing correlation functions indicate metastability; slopes become more negative with decreasing stability. While this analysis revealed that all patients transiently occupied state 2, with greatest persistence in patient C, patients A, C, and E had non-monotonic correlation functions for state 7, coinciding with prolonged times to recovery compared to the rest of the cohort, with patients B and F exhibiting the expected monotonic decrease (Fig. 2D). This indicated that patients A, C, and E repeatedly entered and exited state 7, suggesting that prolonged diarrhea in these three patients may have been additionally influenced by the instability or inaccessibility of alternative, healthy states, and that (re-)assembly of the healthy microbial community constitutes a non-trivial step in recovery.

### Dynamics of two healthy adult microbiomes with transient diarrhea

In contrast to the cholera data set, the two healthy adult gut microbiome time series from David *et al.* [8] were separated by subject (Fig. 3A). Despite being clinically healthy for most of the observation period, both subjects’ microbiomes experienced perturbations: subject A traveled from his residence in the United States to southeast Asia, twice experiencing traveller’s diarrhea; and subject B, also based in the US, suffered an acute infection by *Salmonella*. Previous studies [8, 18] noted that, while the microbiome of A returned to its original state after travel, recovery from *Salmonella* left the microbiome of B in an alternative state. Confirming this, we found that subject A occupied the same regions of phase space before and after travel, while subject B occupied disjoint regions before and after infection. We further found that the post-*Salmonella* samples of subject B distributed over several connected components, showing that the gut microbiome of subject B remained in flux across several distinct compositional substates even after being clinically marked as having recovered (Fig 3B).

The large connected components representing the pre- and post-travel healthy samples of subject A and the pre-*Salmonella* healthy samples of subject B were each divided into several states (Supplementary Information Fig. 1), suggesting that the clinical ‘healthy’ phenotype of an individual is a probability over multiple compositionally distinct states. The existence of states in

156 microbiome phase space proposes a novel metric for microbiome resilience: comparing the distri-  
157 bution of samples across states between time windows. Subject A occupied states with identical  
158 probability before and after travel, exhibiting resilience; in contrast, subject B post-infection did  
159 not restore the pre-infection probability across states, despite some samples sharing states with  
160 pre-infection healthy samples (Fig. 4A). Thus, the restoration of the microbial community to a  
161 ‘healthy’ state cannot be confirmed with a single time point.

162 Temporal correlation functions further showed that subject A, as well as subject B before  
163 infection, repeatedly visited the same set of states; in contrast, subject B after infection transiently  
164 occupied several states without repetition (Fig. 4B). This shows that not only did the microbiome  
165 of subject B enter an alternative state, or probability across states, post-infection, but that this  
166 alternative state was not fully stabilized. It is possible that the pre-infection probability across  
167 states was restored in subject B after the end of the observational period.

## 168 Recurrent seasonal dynamics of *Prochlorococcus* communities in the Pa- 169 cific and Atlantic

170 Compared to the phase spaces of human gut microbiomes, which may be discretized by individual  
171 or phenotype, the *Prochlorococcus* phase space was organized by gradients of depth (Fig. 5A) and  
172 temperature (Supporting Fig. 4), indicating that, in these environments, small changes to envi-  
173 ronmental conditions result in small changes to community structure. The phase space possessed  
174 multiple states (Fig 5B), with state 4 largely representing shallow fractions of the water column  
175  $\leq 100\text{m}$ ; states 2, 3, and 6 deeper fractions; and state 1 intermediate depths. State 5 represented  
176 an infrequently-occupied region sampled only by the 140m fraction at BATS on January 27, 2004,  
177 and by the 125m fraction at HOT on January 31, 2008. As such, state 5 possibly constitutes an al-  
178 ternative state for deep water fractions in mid-winter. Communities differing in depth rarely shared  
179 compositions, and transitioned between states, in many cases periodically across calendar years  
180 (Fig. 5C), showing that some communities experienced abrupt periodic shifts in environmental  
181 conditions due to geochemical events.

182 Despite the graduated variation of composition with depth and temperature, the range of  
183 compositional dissimilarity across the range of environmental conditions is sufficient to constrain  
184 given depth fractions to a neighborhood of phase space, such that shallow- and deep-fraction  
185 *Prochlorococcus* communities rarely occupy the same compositional states over time (Fig. 5C).  
186 However, it is known that the BATS water column undergoes an annual late winter upwelling [28],  
187 intermixing communities that otherwise inhabit different depths, and homogenizing environmental  
188 conditions across depths. We predicted that mixing would drive communities at all depths at BATS  
189 to converge on a common state, while no convergence would be observed at HOT. Accordingly,  
190 we observed a transition to state 1 by all depths at BATS in January of each year. After June,  
191 depths 1-20m and 120-200m relax toward states characteristic of shallow and deep depth fractions,  
192 respectively, while state 1 persists longer in intermediate depths 40-100m. By contrast, no such  
193 upwelling occurs at HOT, and the probability of a given depth fraction occupying any state remains  
194 uniform over the calendar year; the distribution is especially stationary for shallow depths (Fig. 5C).  
195 This periodicity was also evident in periodic correlation functions for BATS, and non-periodic for  
196 HOT (Fig. 5D).

## 197 Robustness of potential estimation

198 Given that the data sets analyzed here are among the largest longitudinal microbiome data sets  
199 currently available, we asked whether the biological hypotheses could have been obtained from  
200 sparser data sets. We focused on our finding that microbiome phase spaces are structured by  
201 latent variables representing host phenotypes or environmental conditions, and examined whether  
202 this structuring was robust to data rarefaction. We found that the partitioning of the phase  
203 space by clinical phenotype in the case of the cholera patients, by subject in the case of the two  
204 healthy adult humans, and the gradation by depth in the case of *Prochlorococcus* communities,  
205 are robust to all rarefaction tests performed. In the case of cholera patients, nodes remained  
206 divided into those representing mostly samples from the diarrhea phase and those representing  
207 the recovery phase, with edges being more dense between nodes of the same phenotype than  
208 those of different phenotypes (Supporting Information Fig. 3). In the case of the two healthy  
209 adult humans, nodes were consistently dominated by samples from one subject, with edges being

210 more dense between nodes representing the same subject than those representing different subjects  
211 (Supporting Information Fig. 4). For the *Prochlorococcus* data set, nodes aggregating samples  
212 from similar depth fractions were more densely connected than those representing disparate depths  
213 (Supporting Information Fig. 5).

## 214 Discussion

215 We identified unrecognized dynamics governing large-scale phenotypes in microbial time series  
216 data by using TDA to infer the shape of a potential landscape from 16S and ITS ribosomal RNA  
217 time series data. Our results reveal the role of latent physiological and environmental variables  
218 [29], such as disease phenotype and phase of geochemical cycles, in organizing microbiomes over  
219 time. We observed common dynamics across instances of ecological processes in the two gut and  
220 one environmental timeseries datasets we studied. Using our approach, one can thus begin to  
221 infer general mechanisms that determine large scale phenotypes of clinical and environmental im-  
222 portance. The elements of our method—the definition of a metric phase space using the square  
223 root of the Jensen-Shannon divergence, the representation of the phase space using TDA, and  
224 the characterization of topological features using the adapted kNN density estimator and shortest  
225 graph distance searches—are specifically advantageous for analyzing high-dimensional composi-  
226 tional data. Compared to representational methods such as PCA, our method benefits from using  
227 all distance information; and compared to clustering techniques, our method does not require  
228 specifying the number of states, such as required in k-means.

229 While subjects in both human gut data sets experienced transient infection by bacterial pathogens,  
230 the large-scale dynamics differed between the two groups. We found that multiple cholera patients  
231 followed a trajectory of early- to late-stage disease states. In contrast, the two healthy subjects  
232 from the year-long data set experienced apparently random jumps between states during *Salmonella*  
233 infection and traveler’s diarrhea, respectively. This discordance between the two human gut mi-  
234 crobiome datasets suggests that microbial infections can potentially be classified into ‘ordered’  
235 and ‘disordered’ types. Ordered infections are characterized by a reproducible trajectory through  
236 phase space, while disordered infections are characterized by unpredictable progression through  
237 phase space. The latter case represents a version of the ‘Anna Karenina principle,’ meaning indi-  
238 vidual microbiomes are more dissimilar during a particular perturbation than during health [45],  
239 while the former represents an inversion of the principle. Scale is likely important in this dis-  
240 tinction: independent of the deterministic or stochastic nature of the perturbation induced by  
241 an infection, if its magnitude is smaller than ‘baseline’ fluctuations of the healthy microbiome,  
242 variations between individuals will remain the dominant variable in organizing the phase space. If  
243 the magnitude of the perturbation is larger, it may overwhelm individual variability and cause the  
244 phase space to instead appear organized by phenotype. Thus, data on the variability of healthy  
245 microbiomes over time between and within individuals will be crucial to characterizing the impact  
246 of a given disease on the microbiome.

247 Our analysis of the David *et al.* data set shows that the microbiome of a healthy individual  
248 transitions between states over time. While key dominant taxa may persist, no single large-scale  
249 compositional state defines healthy physiology. However, an individual microbiome may occupy  
250 states with the same probability during two separate ‘healthy’ time windows. Integrating the  
251 information over time for each of the healthy periods, the physiological phenotype can be inferred  
252 to be stable despite the system state being dynamic. Put differently, if one interprets states as  
253 microstates of the microbiome composition, a systemic clinical or environmental phenotype could  
254 then be regarded as a *macrostate*, and a resilient ‘healthy’ microbiome will remain in a stable  
255 macrostate over time.

256 This notion of resilience as identical probability across states before and after a perturbation  
257 can be generalized to a notion of dynamic stability, defined as stationary probability across states  
258 over time. Dynamically stable microbiomes do not necessarily stabilize within a single state,  
259 but revisit a given set of states with fixed probability. Our temporal correlation analysis shows  
260 that dynamically stable microbiomes, such as subject A and subject B pre-infection from the  
261 study in [8], are characterized by non-monotonic temporal correlation functions, indicating the  
262 microbiome revisits the same states over time. In contrast, unstable microbiomes, such as subject  
263 B post-infection, exhibit monotonically decaying correlation functions, indicating the microbiome  
264 transiently occupies compositional states without recurrence. Dynamical instability can persist  
265 after infection even in the microbiome of an individual clinically marked as having recovered from

266 infection, as in the case of subject B, revealing additional nuances to the association between  
267 stability and health in human microbiomes. The ability to assess resilience from data in the absence  
268 of detailed knowledge of the underlying network of microbe-microbe interactions complements  
269 model-based methods that analytically solve for fixed points and linear stability [5].

270 For the two human gut microbiome data sets, we observe some of the same phenomena as the  
271 original studies: for the seven cholera patients, certain taxa were differentially abundant throughout  
272 the progression of disease [22]; and for subject B of the two healthy males, that the pre-*Salmonella*  
273 microbiome composition was not recovered by the end of the experiment [8]. In the first case, we  
274 remark that differential abundance of individual taxa does not necessarily imply the existence of  
275 large-scale compositional states consistent across patients and disease phases, such as we describe  
276 here. In the second case, we additionally found multiple states in the pre- and post-perturbation  
277 healthy phases of both subjects, and showed that restoration of a healthy and resilient microbiome is  
278 associated with the recovery not of a specific composition but of a distribution across compositional  
279 states.

280 We point out several caveats regarding our method. First, though we defined the phase space  
281 using the Jensen-Shannon distance, other metrics may be used, and the results of analysis using  
282 different metrics for the same data should be compared in future applications. Second, due to  
283 the lack of an established protocol for selecting Mapper hyperparameters, we used a heuristic  
284 method to choose their values for our analyses. A more rigorous optimization method is desirable,  
285 especially one developed against synthetic data from *de novo* simulations where the ‘ground truth’  
286 of the parameters, and thus the shape of the potential landscape, are known *a priori*. Third, we  
287 use Mapper to create a representation of the potential landscape, but the landscape and question  
288 of whether it is effective to model microbiome dynamics in a given case using a potential landscape  
289 are independent of Mapper and TDA, and other methods may be used. Fourth, we assume the  
290 data accurately represent the compositions of the sampled communities, when in fact challenges  
291 exist with translating sequencing data into compositions [16, 17]; addressing these challenges is  
292 outside the scope of this manuscript.

293 In real ecosystems such as those under study, several factors may complicate the basic prediction  
294 of the potential landscape that real ecosystems evolve toward configurations of lowest potential,  
295 and thus limit predictive power. First, real systems are open to their environment and subject  
296 to external perturbation; the dynamics of an ecosystem experiencing strong driving forces may  
297 deviate from that predicted by the potential landscape. In addition, strong stochastic fluctuations  
298 in microbial populations may weaken the predictive power of the potential landscape; however,  
299 in this case, the potential landscape may still form an informative ‘deterministic skeleton’ of the  
300 dynamics [1]. Third, high dimensionality may also increase the number and complexity of paths  
301 by which the system evolves toward lower potential. Finally, the time scales of sampling may differ  
302 from those that are predictable by the potential landscape; for example, the potential landscape  
303 may well predict the dynamics of gut microbiome relaxation after a meal on the time scale of  
304 hours, but this may not be captured by daily sampling. Nolting [30] and Abbott [1] discuss some  
305 of these factors in detail. As above, analysis of synthetic data generated by theoretical population  
306 dynamics models may help elucidate the limits of potential landscape inference and prediction.

307 In addition to offering a novel quantitative description of microbiome states and dynamics,  
308 we hope our analysis will, in time, facilitate predictive modeling of the dynamics and forecast-  
309 ing of major state transitions in the microbiome. As an example, our approach to identifying  
310 states from microbial time series can be used to infer state transition probabilities under different  
311 conditions, and thus can serve as a basis for fitting the parameters of Markov chain models [9,  
312 11]. Alternatively, the theory of critical transition forecasting [6, 7, 26, 37, 36] is closely linked  
313 to the concept of the potential: as perturbations destabilize a system, it ascends the potential  
314 gradient and eventually reaches a tipping point from where it can rapidly enter into an alternative  
315 stable state. Topological analyses, in turn, may enable characterization of the system state and  
316 potential based on past observations, and real-time estimation of its stability and state transition  
317 probability. Both of these approaches allow modeling and prediction of major dynamical events  
318 without detailed knowledge of underlying mechanisms, and may prove pivotal to understanding  
319 complex, data-rich biological systems not limited to microbiomes, but also including, for instance,  
320 gene regulatory networks and animal ecosystems.

## 321 Methods

### 322 Human gut microbiome data and preprocessing

323 The publicly available data that we re-analyzed here were generated by David *et al* [8] accessible  
324 on the European Nucleotide Archive (ENA) under the accession number ERP006059, and by Hsiao  
325 *et al* [22] on the NCBI Short Read Archive (SRA) under the accession number PRJEB6358. The  
326 downloaded reads were trimmed with V-xtractor version 2.1 [21] to ensure the amplicon sequences  
327 could be aligned across consistent fractions of the 16S rRNA variable regions. Trimmed reads  
328 were then clustered into OTUs at a Levenshtein distance of two using CrunchClust version 43 [20]  
329 and classified up to the family level using MOTHUR version 1.36.1 [38] and Silva release 128 [33]  
330 reference sequences.

### 331 *Prochlorococcus* data

332 Data from Malstrom *et al* [28] was obtained from the Biological and Chemical Oceanography Data  
333 Management Office (<https://www.bco-dmo.org>), accession number 3381.

### 334 Mapper

335 Conceptually, the Mapper algorithm accepts as input a matrix of distances or dissimilarities be-  
336 tween data, and aims to represent the shape of the distribution of data points in high-dimensional  
337 phase space as an undirected graph. In this graph, vertices represent neighborhoods of phase space  
338 spanned by subsets of adjacent data points, and edges represent connectivity between neighbor-  
339 hoods. In brief, it does this by dividing the data into overlapping subsets that are similar according  
340 to the output of at least one filter function that assigns a scalar value to each data point, perform-  
341 ing local clustering on each subset, and representing the result as an undirected graph, where each  
342 vertex represents a local cluster of data points, and edges between vertices represent at least one  
343 shared data point between clusters.

### 344 Distance matrix

345 We interpreted microbiome relative abundances to be probability distributions, and thus used the  
346 square root of the Jensen-Shannon divergence as a metric [24]. However, it is important to note  
347 that any other metric can be used in place of the Jensen-Shannon distance, such as an Euclidean  
348 calculated from centered [25] or isometric [39] log-transformed relative abundances.

### 349 Filter functions and binning

350 For the filter functions used by Mapper to bin data points, we performed principal coordinate  
351 analysis (PCoA, also known as classical multidimensional scaling) in two dimensions on the pairwise  
352 distance matrix, and used the ranked values of principal coordinates (PCo) 1 and 2 as the first and  
353 second filter values for Mapper, following Rizvi *et al.* [34]. PCo ranks are an appropriate filter for  
354 our purposes, as it assigns similar filter values to points that are relatively close together in the  
355 original phase space. We wish to note that while PCoA leads to loss of information, the following  
356 local clustering step is performed using subsets of distances from the original distance matrix, and  
357 is thus not affected. The data points were then binned by overlapping intervals of the two ranked  
358 principal coordinates. For hyperparameters specifying these bins and their overlaps, see Table 1.

### 359 Local clustering

360 The algorithm first performs hierarchical clustering from all pairwise distances between data points  
361 within a bin of filter values. Then, it creates a histogram of branch lengths using a predefined  
362 number of bins, and uses the first empty bin in the histogram as a cutoff value, separating the  
363 hierarchical tree into single-linkage clusters. The algorithm thus finds a separation of length scales  
364 within each neighborhood of phase space represented by a bin of the filter values. We used the  
365 default number of histogram bins, 10, for each data set (Table 1).

## 366 Creating the undirected Mapper graph

367 The final output is produced by representing each local cluster of data points as a vertex, and  
368 drawing an edge between each pair of vertices that share at least one data point. When plotting,  
369 the size of each vertex represents the number of data points therein.

## 370 Selection of hyperparameters

371 The Mapper algorithm is relatively new, and there are currently no standard protocols to optimize  
372 the values of the hyperparameters. For our purposes, it was important that the algorithm achieved  
373 a sufficiently high resolution in partitioning data, but also adequately represented connections  
374 between regions of phase space. We thus used the following heuristic to set the number of intervals  
375 and percent overlap for each data set.

- 376 1. The largest vertex in the resultant Mapper graph should represent no more than  $\approx 10\%$  of  
377 the total number of data points in the set;
- 378 2. the number of connected components representing only one data point should be minimized.

379 We acknowledge that a heuristic determination of appropriate hyperparameter values leaves  
380 much to be desired; as such, we recommend future in-depth theoretical explorations of how the  
381 Mapper output depends on the choice of hyperparameters.

## 382 Potential estimation

We estimated the potential for each vertex by calculating the  $k$ -nearest neighbors (kNN) density [10] for each constituent data point  $i$ :

$$\text{kNN}(i, k) = \frac{\sum_j^k d_{ij}}{k} \quad (1)$$

where  $d_{ij}$  is the distance between points  $i$  and  $j$ , choosing  $k$  equal to 10% of the number of samples in each data set, rounded to the nearest integer. kNN varies inversely with density, making it a proxy for the potential. For a vertex  $V$  representing  $n$  points, we define its potential as

$$U(V) = \frac{\sum_{i \in V} \text{kNN}(i, k)}{n^2} \quad (2)$$

383 The  $n^2$  term in the denominator compensates for the differing sizes of vertices.

## 384 State assignment

We then defined states as topological features of the landscape surrounding local minima of  $U$ . We designated each vertex with lower  $U$  than its neighbors to be a local minimum of the potential. Connected vertices tied for minimum  $U$  were each assigned to be a local minimum. To approximate a gradient, we converted the undirected Mapper graph to a directed graph, with each edge pointing from the the vertex with greater  $U$  to the one with lower  $U$ . For each non-minimum vertex, we found the graph distance  $d_g$  to each local minimum constrained by edge direction. We defined the *state*  $B_x$  of a minimum  $V_x$  as the set of vertices  $V$  with uniquely shortest graph distance to  $V_x$ :

$$V \in B_x \text{ if } d_g(V, V_x) < d_g(V, V_y) \quad (3)$$

385 for all  $x \neq y$  and  $V_y \in M$ , where  $M$  is the set of all local minima (Fig 1B). Vertices equidistant to  
386 multiple minima were defined to be unstable regions unassigned to any state. Multiple connected  
387 minima were defined as belonging to the same state. Notably, one data point may be associated  
388 with multiple vertices and states, or an unstable region and at least one state: we interpreted this  
389 to mean that the point is near a saddle point separating states, and as the ‘true’ coordinates of the  
390 saddle point are unknown, the data point is assigned to *all* such states and/or an unstable region  
391 with uniform weight.



## 392 Calculating the temporal correlation function

Given that a system occupied state  $B_x$  at time  $t$ , we defined the temporal correlation to be the expectation that it will still (or again) occupy state  $B_x$  at time  $t + \tau$ :

$$f_x(t) = \begin{cases} 1 & \text{if system is associated with state } B_x \text{ at time } t \\ 0 & \text{otherwise.} \end{cases} \quad (4)$$

$$\text{corr}_x(\tau) = \langle f_x(t + \tau) \rangle \quad (5)$$

393 We calculated the correlation function for each state  $x$  visited by a subject during a characteristic  
394 period and for all sampled intervals of length  $\tau$ , where  $f_x(t) = 1$ . For the cholera data set, we  
395 calculated correlation functions for each state visited by each subject over the disease period. For  
396 the data set of two healthy adult males, we calculated correlation functions for each state visited  
397 by each subject in each healthy period, either before or after infection. For the *Prochlorococcus*  
398 data set, we calculated correlation functions for each state at each depth fraction at either site.  
399 Where a data point is associated with multiple states, we weigh the association with each state  
400 as  $f'_x(t) = \frac{1}{p}f_x(t)$ , with  $p$  the total number of unique states associated with the system at time  $t$ ,  
401 with the unassigned/unstable state regarded as a single distinct state.

## 402 Rarefaction test

403 We created random subsets of each data set representing 90%, 50%, and 10% of the original data  
404 points, repeating 10 times for each data set and downsampling ratio. We then created Mapper  
405 graphs representing the rarefied data using the same hyperparameters as for each of the full data  
406 sets. We colored the vertices to indicate the same features as for the full data sets: for the cholera  
407 data set, by fraction of samples belonging to the diarrhea or recovery phase; for the two healthy  
408 adult gut microbiomes data set, by fraction of samples obtained from each subject; and for the  
409 *Prochlorococcus* data set, by the mean depth from which samples originated. We ordered the  
410 vertices by feature value and used a circularized linear layout algorithm, such that vertices with  
411 similar feature values are adjacent. Finally, we used shading to display edge densities.

## 412 Software and data

413 The main repository for the study can be found on GitHub, at [http://github.com/kellylab/  
414 microbial-landscapes](http://github.com/kellylab/microbial-landscapes).

415 An open-source implementation of Mapper in R, `TDAmapper`, was used for the main analysis  
416 and can be found at <http://github.com/wkc1986/TDAmapper>. This package was forked from the  
417 original implemented by Daniel Müllner which is maintained by Paul T. Pearson and can be found  
418 at <https://github.com/paultpearson/TDAmapper>.

## 419 Funding

420 L.K. is supported in part by a Peer Reviewed Cancer Research Program Career Development  
421 Award from the United States Department of Defense (CA171019).

## 422 Author's contributions

423 W.K.C. designed and performed the analysis. D.V. processed and performed OTU calling on the  
424 data from Hsiao *et al.*[22] and David *et al.*[8]. W.K.C., D.V., and L.K. wrote the manuscript.

## 425 References

- 426 [1] Karen C. Abbott and Ben C. Nolting. “Alternative (un)stable states in a stochastic pred-  
427 ator–prey model”. In: *Ecological Complexity* 32 (Dec. 2017), pp. 181–195. ISSN: 1476945X. DOI:  
428 [10.1016/j.ecocom.2016.11.004](https://doi.org/10.1016/j.ecocom.2016.11.004). URL: [http://linkinghub.elsevier.com/retrieve/  
429 pii/S1476945X16301039](http://linkinghub.elsevier.com/retrieve/pii/S1476945X16301039) (visited on 03/23/2018).
- 430 [2] J. Paul Brooks et al. “Changes in vaginal community state types reflect major shifts in the  
431 microbiome”. In: *Microbial Ecology in Health and Disease* 28.1 (Jan. 1, 2017), p. 1303265.  
432 ISSN: null. DOI: [10.1080/16512235.2017.1303265](https://doi.org/10.1080/16512235.2017.1303265). URL: [https://doi.org/10.1080/  
433 16512235.2017.1303265](https://doi.org/10.1080/16512235.2017.1303265) (visited on 08/05/2019).
- 434 [3] C. Casén et al. “Deviations in human gut microbiota: a novel diagnostic test for determining  
435 dysbiosis in patients with IBS or IBD”. In: *Alimentary Pharmacology & Therapeutics* 42.1  
436 (July 2015), pp. 71–83. ISSN: 1365-2036. DOI: [10.1111/apt.13236](https://doi.org/10.1111/apt.13236).
- 437 [4] Hasan Celiker and Jeff Gore. “Clustering in community structure across replicate ecosys-  
438 tems following a long-term bacterial evolution experiment”. In: *Nature Communications* 5  
439 (Aug. 8, 2014). ISSN: 2041-1723. DOI: [10.1038/ncomms5643](https://doi.org/10.1038/ncomms5643). URL: [http://www.nature.com/  
doifinder/10.1038/ncomms5643](http://www.nature.com/<br/>440 doifinder/10.1038/ncomms5643) (visited on 12/18/2014).
- 441 [5] Katharine Z. Coyte, Jonas Schluter, and Kevin R. Foster. “The ecology of the microbiome:  
442 Networks, competition, and stability”. In: *Science* 350.6261 (Nov. 6, 2015), pp. 663–666. ISSN:  
443 0036-8075, 1095-9203. DOI: [10.1126/science.aad2602](https://doi.org/10.1126/science.aad2602). URL: [http://www.sciencemag.  
org/content/350/6261/663](http://www.sciencemag.<br/>444 org/content/350/6261/663) (visited on 11/07/2015).
- 445 [6] L. Dai et al. “Generic Indicators for Loss of Resilience Before a Tipping Point Leading to  
446 Population Collapse”. In: *Science* 336.6085 (June 1, 2012), pp. 1175–1177. ISSN: 0036-8075,  
447 1095-9203. DOI: [10.1126/science.1219805](https://doi.org/10.1126/science.1219805). URL: [http://www.sciencemag.org/cgi/doi/  
10.1126/science.1219805](http://www.sciencemag.org/cgi/doi/<br/>448 10.1126/science.1219805) (visited on 09/12/2014).
- 449 [7] Vasilis Dakos and Jordi Bascompte. “Critical slowing down as early warning for the onset  
450 of collapse in mutualistic communities”. In: *Proceedings of the National Academy of Sciences*  
451 111.49 (Dec. 9, 2014), pp. 17546–17551. ISSN: 0027-8424, 1091-6490. DOI: [10.1073/pnas.  
452 1406326111](https://doi.org/10.1073/pnas.1406326111). URL: <http://www.pnas.org/lookup/doi/10.1073/pnas.1406326111> (visited  
453 on 11/08/2016).
- 454 [8] Lawrence A. David et al. “Host lifestyle affects human microbiota on daily timescales”. In:  
455 *Genome Biology* 15 (2014), R89. ISSN: 1474-760X. DOI: [10.1186/gb-2014-15-7-r89](https://doi.org/10.1186/gb-2014-15-7-r89). URL:  
456 <http://dx.doi.org/10.1186/gb-2014-15-7-r89> (visited on 08/12/2016).
- 457 [9] Daniel B. DiGiulio et al. “Temporal and spatial variation of the human microbiota during  
458 pregnancy”. In: *Proceedings of the National Academy of Sciences* 112.35 (Sept. 1, 2015),  
459 pp. 11060–11065. ISSN: 0027-8424, 1091-6490. DOI: [10.1073/pnas.1502875112](https://doi.org/10.1073/pnas.1502875112). URL: [https://  
460 www.pnas.org/content/112/35/11060](https://www.pnas.org/content/112/35/11060) (visited on 01/03/2019).
- 461 [10] Richard O. Duda, Peter E. Hart, and David G. Stork. *Pattern classification*. Google-Books-  
462 ID: YoxQAAAAMAAJ. Wiley, 2001. 688 pp. ISBN: 978-0-471-05669-0.
- 463 [11] Mathieu Faure and Sebastian J. Schreiber. “Quasi-stationary distributions for randomly per-  
464 turbed dynamical systems”. In: *The Annals of Applied Probability* 24.2 (Apr. 2014), pp. 553–  
465 598. ISSN: 1050-5164. DOI: [10.1214/13-AAP923](https://doi.org/10.1214/13-AAP923). URL: [http://projecteuclid.org/euclid.  
aoap/1394465365](http://projecteuclid.org/euclid.<br/>466 aoap/1394465365) (visited on 10/31/2018).
- 467 [12] N. Fierer and R. B. Jackson. “The diversity and biogeography of soil bacterial communities”.  
468 In: *Proceedings of the National Academy of Sciences* 103.3 (Jan. 17, 2006), pp. 626–631. ISSN:  
469 0027-8424, 1091-6490. DOI: [10.1073/pnas.0507535103](https://doi.org/10.1073/pnas.0507535103). URL: [http://www.pnas.org/cgi/  
doi/10.1073/pnas.0507535103](http://www.pnas.org/cgi/<br/>470 doi/10.1073/pnas.0507535103) (visited on 08/05/2019).
- 471 [13] Jonathan Friedman and Eric J. Alm. “Inferring Correlation Networks from Genomic Survey  
472 Data”. In: *PLOS Computational Biology* 8.9 (Sept. 20, 2012), e1002687. ISSN: 1553-7358.  
473 DOI: [10.1371/journal.pcbi.1002687](https://doi.org/10.1371/journal.pcbi.1002687). URL: [https://journals.plos.org/ploscompbiol/  
article?id=10.1371/journal.pcbi.1002687](https://journals.plos.org/ploscompbiol/<br/>474 article?id=10.1371/journal.pcbi.1002687) (visited on 09/04/2018).
- 475 [14] Jed A. Fuhrman, Jacob A. Cram, and David M. Needham. “Marine microbial community  
476 dynamics and their ecological interpretation”. In: *Nature Reviews Microbiology* 13.3 (Mar.  
477 2015), pp. 133–146. ISSN: 1740-1526. DOI: [10.1038/nrmicro3417](https://doi.org/10.1038/nrmicro3417). URL: [http://www.nature.  
com/nrmicro/journal/v13/n3/abs/nrmicro3417.html](http://www.nature.<br/>478 com/nrmicro/journal/v13/n3/abs/nrmicro3417.html) (visited on 03/03/2015).

- 479 [15] Pawel Gajer et al. “Temporal Dynamics of the Human Vaginal Microbiota”. In: *Science*  
480 *Translational Medicine* 4.132 (May 2, 2012), 132ra52–132ra52. ISSN: 1946-6234, 1946-6242.  
481 DOI: [10.1126/scitranslmed.3003605](https://doi.org/10.1126/scitranslmed.3003605). URL: [http://stm.sciencemag.org/content/4/](http://stm.sciencemag.org/content/4/132/132ra52)  
482 [132/132ra52](http://stm.sciencemag.org/content/4/132/132ra52) (visited on 02/04/2016).
- 483 [16] Gregory Brian Gloor et al. “Compositional uncertainty should not be ignored in high-  
484 throughput sequencing data analysis”. In: *Austrian Journal of Statistics* 45.4 (July 28, 2016),  
485 pp. 73–87. ISSN: 1026-597X. DOI: [10.17713/ajs.v45i4.122](https://doi.org/10.17713/ajs.v45i4.122). URL: [https://www.ajs.or.](https://www.ajs.or.at/index.php/ajs/article/view/vol45-4-5)  
486 [at/index.php/ajs/article/view/vol45-4-5](https://www.ajs.or.at/index.php/ajs/article/view/vol45-4-5) (visited on 07/11/2019).
- 487 [17] Gregory B. Gloor et al. “Microbiome Datasets Are Compositional: And This Is Not Optional”.  
488 In: *Frontiers in Microbiology* 8 (2017). ISSN: 1664-302X. DOI: [10.3389/fmicb.2017.02224](https://doi.org/10.3389/fmicb.2017.02224).  
489 URL: [https://www.frontiersin.org/articles/10.3389/fmicb.2017.02224/full?](https://www.frontiersin.org/articles/10.3389/fmicb.2017.02224/full?report=reader)  
490 [report=reader](https://www.frontiersin.org/articles/10.3389/fmicb.2017.02224/full?report=reader) (visited on 07/11/2019).
- 491 [18] Didier Gonze et al. “Microbial communities as dynamical systems”. In: *Current Opinion in*  
492 *Microbiology* 44 (Aug. 1, 2018), pp. 41–49. ISSN: 1369-5274. DOI: [10.1016/j.mib.2018.07.](https://doi.org/10.1016/j.mib.2018.07.004)  
493 [004](https://doi.org/10.1016/j.mib.2018.07.004). URL: <http://www.sciencedirect.com/science/article/pii/S1369527418300092>  
494 (visited on 07/24/2018).
- 495 [19] Shi Gu et al. “The Energy Landscape of Neurophysiological Activity Implicit in Brain Net-  
496 work Structure”. In: *Scientific Reports* 8.1 (Feb. 6, 2018), p. 2507. ISSN: 2045-2322. DOI:  
497 [10.1038/s41598-018-20123-8](https://doi.org/10.1038/s41598-018-20123-8). URL: [https://www.nature.com/articles/s41598-018-](https://www.nature.com/articles/s41598-018-20123-8)  
498 [20123-8](https://www.nature.com/articles/s41598-018-20123-8) (visited on 11/19/2018).
- 499 [20] Martin Hartmann et al. “Significant and persistent impact of timber harvesting on soil mi-  
500 crobrial communities in Northern coniferous forests”. In: *The ISME Journal* 6.12 (Dec. 2012),  
501 pp. 2199–2218. ISSN: 1751-7370. DOI: [10.1038/ismej.2012.84](https://doi.org/10.1038/ismej.2012.84). URL: [https://www.nature.](https://www.nature.com/articles/ismej201284)  
502 [com/articles/ismej201284](https://www.nature.com/articles/ismej201284) (visited on 08/08/2019).
- 503 [21] Martin Hartmann et al. “V-Xtractor: an open-source, high-throughput software tool to iden-  
504 tify and extract hypervariable regions of small subunit (16S/18S) ribosomal RNA gene se-  
505 quences”. In: *Journal of Microbiological Methods* 83.2 (Nov. 2010), pp. 250–253. ISSN: 1872-  
506 8359. DOI: [10.1016/j.mimet.2010.08.008](https://doi.org/10.1016/j.mimet.2010.08.008).
- 507 [22] Ansel Hsiao et al. “Members of the human gut microbiota involved in recovery from *Vibrio*  
508 *cholerae* infection”. In: *Nature* 515.7527 (Nov. 20, 2014), pp. 423–426. ISSN: 0028-0836. DOI:  
509 [10.1038/nature13738](https://doi.org/10.1038/nature13738). URL: [http://www.nature.com/nature/journal/v515/n7527/](http://www.nature.com/nature/journal/v515/n7527/full/nature13738.html)  
510 [full/nature13738.html](http://www.nature.com/nature/journal/v515/n7527/full/nature13738.html) (visited on 02/11/2016).
- 511 [23] Sui Huang, Ingemar Ernberg, and Stuart Kauffman. “Cancer attractors: A systems view of  
512 tumors from a gene network dynamics and developmental perspective”. In: *Seminars in cell*  
513 *& developmental biology* 20.7 (Sept. 2009), pp. 869–876. ISSN: 1084-9521. DOI: [10.1016/j.](https://doi.org/10.1016/j.semcdb.2009.07.003)  
514 [semcdb.2009.07.003](https://doi.org/10.1016/j.semcdb.2009.07.003). URL: <http://www.ncbi.nlm.nih.gov/pmc/articles/PMC2754594/>.
- 515 [24] Omry Koren et al. “A Guide to Enterotypes across the Human Body: Meta-Analysis of Micro-  
516 bial Community Structures in Human Microbiome Datasets”. In: *PLOS Computational Bi-*  
517 *ology* 9.1 (Jan. 10, 2013), e1002863. ISSN: 1553-7358. DOI: [10.1371/journal.pcbi.1002863](https://doi.org/10.1371/journal.pcbi.1002863).  
518 URL: [http://journals.plos.org/ploscompbiol/article?id=10.1371/journal.pcbi.](http://journals.plos.org/ploscompbiol/article?id=10.1371/journal.pcbi.1002863)  
519 [1002863](http://journals.plos.org/ploscompbiol/article?id=10.1371/journal.pcbi.1002863) (visited on 04/27/2017).
- 520 [25] Zachary D. Kurtz et al. “Sparse and Compositionally Robust Inference of Microbial Ecological  
521 Networks”. In: *PLOS Computational Biology* 11.5 (May 7, 2015), e1004226. ISSN: 1553-7358.  
522 DOI: [10.1371/journal.pcbi.1004226](https://doi.org/10.1371/journal.pcbi.1004226). URL: [https://journals.plos.org/ploscompbiol/](https://journals.plos.org/ploscompbiol/article?id=10.1371/journal.pcbi.1004226)  
523 [article?id=10.1371/journal.pcbi.1004226](https://journals.plos.org/ploscompbiol/article?id=10.1371/journal.pcbi.1004226) (visited on 04/30/2019).
- 524 [26] Ingrid A. van de Leemput et al. “Critical slowing down as early warning for the onset and  
525 termination of depression”. In: *Proceedings of the National Academy of Sciences* 111.1 (Jan. 7,  
526 2014), pp. 87–92. ISSN: 0027-8424, 1091-6490. DOI: [10.1073/pnas.1312114110](https://doi.org/10.1073/pnas.1312114110). URL: [http:](http://www.pnas.org/content/111/1/87)  
527 [//www.pnas.org/content/111/1/87](http://www.pnas.org/content/111/1/87) (visited on 01/29/2016).
- 528 [27] Qin Li et al. “Dynamics inside the cancer cell attractor reveal cell heterogeneity, limits of  
529 stability, and escape”. In: *Proceedings of the National Academy of Sciences of the United*  
530 *States of America* 113.10 (Mar. 8, 2016), pp. 2672–2677. ISSN: 1091-6490. DOI: [10.1073/](https://doi.org/10.1073/pnas.1519210113)  
531 [pnas.1519210113](https://doi.org/10.1073/pnas.1519210113).

- 532 [28] Rex R. Malmstrom et al. “Temporal dynamics of *Prochlorococcus* ecotypes in the Atlantic  
533 and Pacific oceans”. In: *The ISME Journal* 4.10 (Oct. 2010), pp. 1252–1264. ISSN: 1751-7362.  
534 DOI: [10.1038/ismej.2010.60](https://doi.org/10.1038/ismej.2010.60). URL: [http://www.nature.com/ismej/journal/v4/n10/  
535 full/ismej201060a.html](http://www.nature.com/ismej/journal/v4/n10/full/ismej201060a.html) (visited on 07/13/2016).
- 536 [29] Lan Huong Nguyen and Susan Holmes. “Bayesian Unidimensional Scaling for visualizing  
537 uncertainty in high dimensional datasets with latent ordering of observations”. In: *BMC*  
538 *Bioinformatics* 18.10 (Sept. 13, 2017), p. 394. ISSN: 1471-2105. DOI: [10.1186/s12859-017-  
539 1790-x](https://doi.org/10.1186/s12859-017-1790-x). URL: <https://doi.org/10.1186/s12859-017-1790-x> (visited on 01/03/2019).
- 540 [30] Ben C. Nolting and Karen C. Abbott. “Balls, cups, and quasi-potentials: quantifying stability  
541 in stochastic systems”. In: *Ecology* 97.4 (Apr. 1, 2016), pp. 850–864. ISSN: 1939-9170. DOI:  
542 [10.1890/15-1047.1](https://doi.org/10.1890/15-1047.1). URL: [http://onlinelibrary.wiley.com/doi/10.1890/15-  
543 1047.1/abstract](http://onlinelibrary.wiley.com/doi/10.1890/15-1047.1/abstract) (visited on 03/07/2018).
- 544 [31] Howard Ochman, Jeffrey G. Lawrence, and Eduardo A. Groisman. “Lateral gene transfer  
545 and the nature of bacterial innovation”. In: *Nature* 405.6784 (May 18, 2000), pp. 299–304.  
546 ISSN: 0028-0836. DOI: [10.1038/35012500](https://doi.org/10.1038/35012500). URL: [http://www.nature.com/nature/journal/  
547 v405/n6784/full/405299a0.html](http://www.nature.com/nature/journal/v405/n6784/full/405299a0.html) (visited on 09/01/2015).
- 548 [32] Martin F. Polz, Eric J. Alm, and William P. Hanage. “Horizontal Gene Transfer and the  
549 Evolution of Bacterial and Archaeal Population Structure”. In: *Trends in genetics : TIG*  
550 29.3 (Mar. 2013), pp. 170–175. ISSN: 0168-9525. DOI: [10.1016/j.tig.2012.12.006](https://doi.org/10.1016/j.tig.2012.12.006). URL:  
551 <http://www.ncbi.nlm.nih.gov/pmc/articles/PMC3760709/> (visited on 08/14/2017).
- 552 [33] Christian Quast et al. “The SILVA ribosomal RNA gene database project: improved data  
553 processing and web-based tools”. In: *Nucleic Acids Research* 41 (D1 Jan. 1, 2013), pp. D590–  
554 D596. ISSN: 0305-1048. DOI: [10.1093/nar/gks1219](https://doi.org/10.1093/nar/gks1219). URL: [https://academic.oup.com/  
555 nar/article/41/D1/D590/1069277](https://academic.oup.com/nar/article/41/D1/D590/1069277) (visited on 08/09/2019).
- 556 [34] Abbas H. Rizvi et al. “Single-cell topological RNA-Seq analysis reveals insights into cellular  
557 differentiation and development”. In: *Nature biotechnology* 35.6 (June 2017), pp. 551–560.  
558 ISSN: 1087-0156. DOI: [10.1038/nbt.3854](https://doi.org/10.1038/nbt.3854). URL: [https://www.ncbi.nlm.nih.gov/pmc/  
559 articles/PMC5569300/](https://www.ncbi.nlm.nih.gov/pmc/articles/PMC5569300/) (visited on 11/15/2017).
- 560 [35] Marten Scheffer et al. “Early-warning signals for critical transitions”. In: *Nature* 461.7260  
561 (Sept. 3, 2009), pp. 53–59. ISSN: 0028-0836, 1476-4687. DOI: [10.1038/nature08227](https://doi.org/10.1038/nature08227). URL:  
562 <http://www.nature.com/doi/10.1038/nature08227> (visited on 02/09/2016).
- 563 [36] Marten Scheffer et al. “Generic Indicators of Ecological Resilience: Inferring the Chance of a  
564 Critical Transition”. In: *Annual Review of Ecology, Evolution, and Systematics* 46.1 (2015),  
565 pp. 145–167. DOI: [10.1146/annurev-ecolsys-112414-054242](https://doi.org/10.1146/annurev-ecolsys-112414-054242). URL: [http://dx.doi.org/  
566 10.1146/annurev-ecolsys-112414-054242](http://dx.doi.org/10.1146/annurev-ecolsys-112414-054242) (visited on 11/19/2015).
- 567 [37] M. Scheffer et al. “Anticipating Critical Transitions”. In: *Science* 338.6105 (Oct. 19, 2012),  
568 pp. 344–348. ISSN: 0036-8075, 1095-9203. DOI: [10.1126/science.1225244](https://doi.org/10.1126/science.1225244). URL: [http://  
569 www.sciencemag.org/cgi/doi/10.1126/science.1225244](http://www.sciencemag.org/cgi/doi/10.1126/science.1225244) (visited on 01/24/2015).
- 570 [38] Patrick D. Schloss et al. “Introducing mothur: Open-Source, Platform-Independent, Community-  
571 Supported Software for Describing and Comparing Microbial Communities”. In: *Applied and*  
572 *Environmental Microbiology* 75.23 (Dec. 1, 2009), pp. 7537–7541. ISSN: 0099-2240, 1098-5336.  
573 DOI: [10.1128/AEM.01541-09](https://doi.org/10.1128/AEM.01541-09). URL: <https://aem.asm.org/content/75/23/7537> (visited  
574 on 08/08/2019).
- 575 [39] Justin D. Silverman et al. “A phylogenetic transform enhances analysis of compositional  
576 microbiota data”. In: *eLife* 6 (Feb. 15, 2017), e21887. ISSN: 2050-084X. DOI: [10.7554/eLife.  
577 21887](https://doi.org/10.7554/eLife.21887). URL: <https://elifesciences.org/articles/21887> (visited on 07/12/2017).
- 578 [40] Gurjeet Singh, Facundo Mémoli, and Gunnar Carlsson. “Topological Methods for the Analysis  
579 of High Dimensional Data Sets and 3D Object Recognition”. In: *Eurographics Symposium on*  
580 *Point-Based Graphics* (2007), p. 11.
- 581 [41] Richard R. Stein et al. “Ecological Modeling from Time-Series Inference: Insight into Dy-  
582 namics and Stability of Intestinal Microbiota”. In: *PLoS Comput Biol* 9.12 (Dec. 12, 2013),  
583 e1003388. DOI: [10.1371/journal.pcbi.1003388](https://doi.org/10.1371/journal.pcbi.1003388). URL: [http://dx.doi.org/10.1371/  
584 journal.pcbi.1003388](http://dx.doi.org/10.1371/journal.pcbi.1003388) (visited on 12/18/2014).

- 585 [42] Curtis A. Suttle. “Marine viruses — major players in the global ecosystem”. In: *Nature Re-*  
586 *views Microbiology* 5.10 (Oct. 2007), pp. 801–812. ISSN: 1740-1526. DOI: [10.1038/nrmicro1750](https://doi.org/10.1038/nrmicro1750).  
587 URL: <http://www.nature.com/nrmicro/journal/v5/n10/full/nrmicro1750.html#B2>  
588 (visited on 03/23/2017).
- 589 [43] Peter J. Turnbaugh et al. “The human microbiome project”. In: *Nature* 449.7164 (Oct. 18,  
590 2007), pp. 804–810. ISSN: 1476-4687. DOI: [10.1038/nature06244](https://doi.org/10.1038/nature06244).
- 591 [44] C. H. Waddington. *The Strategy Of The Genes*. 1957. URL: <http://archive.org/details/in.ernet.dli.2015.547782> (visited on 08/05/2019).
- 593 [45] Jesse R. Zaneveld, Ryan McMinds, and Rebecca Vega Thurber. “Stress and stability: applying  
594 the Anna Karenina principle to animal microbiomes”. In: *Nature Microbiology* 2.9 (Sept.  
595 2017), p. 17121. ISSN: 2058-5276. DOI: [10.1038/nmicrobiol.2017.121](https://doi.org/10.1038/nmicrobiol.2017.121). URL: <https://www.nature.com/articles/nmicrobiol2017121> (visited on 11/27/2018).
- 597 [46] J. X. Zhou et al. “Quasi-potential landscape in complex multi-stable systems”. In: *Journal of*  
598 *The Royal Society Interface* 9.77 (Dec. 7, 2012), pp. 3539–3553. ISSN: 1742-5689, 1742-5662.  
599 DOI: [10.1098/rsif.2012.0434](https://doi.org/10.1098/rsif.2012.0434). URL: <http://rsif.royalsocietypublishing.org/cgi/doi/10.1098/rsif.2012.0434> (visited on 10/11/2018).  
600

601 **Figures**

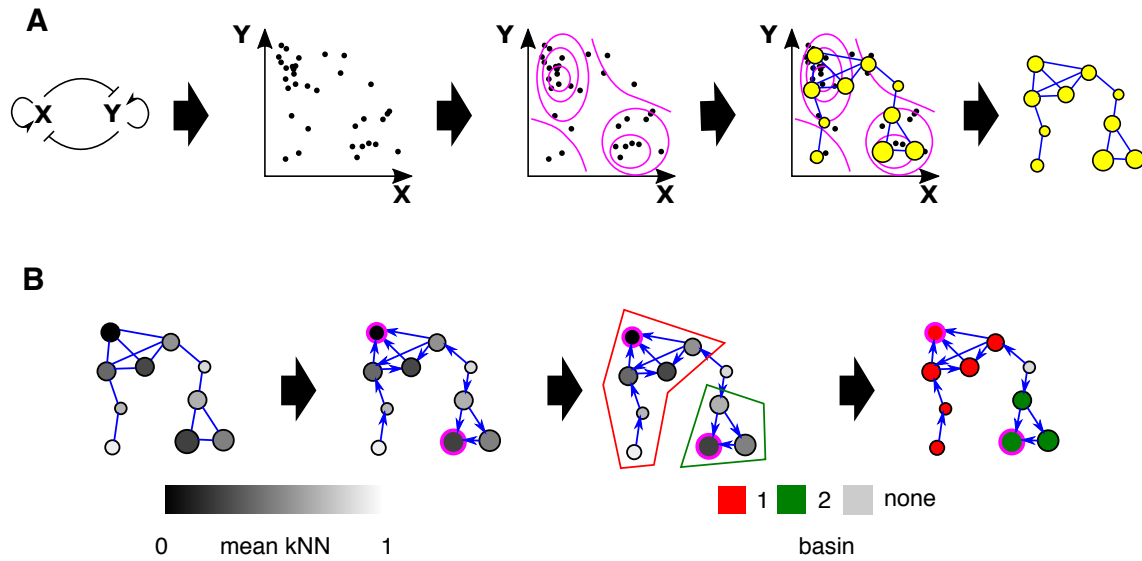

Figure 1: Using Mapper to characterize the microbial phase space. **A.** Using the Mapper algorithm to infer the potential landscape of a toy ecosystem. The mutually antagonistic interaction between species X and Y leads to denser sampling of the phase space where either X or Y is abundant and the other is rare than in other regions; configurations in which X and Y are similar in density are unstable, as small uncertainties in numerical advantage will eventually lead to the dominance of one species over the other. This probability density is analogous to an inverse of the potential landscape. Mapper infers a ‘skeleton’ of density from the data represented as a point cloud. This representation preserves major features of the landscape such as the two densely-sampled clusters separated by a sparsely-sampled region. **B.** Identification of local minima and metastable states in the Mapper graph shown in A. Data density for each vertex is estimated by the mean kNN density (see Methods) for samples associated with that vertex. The graph is converted to a directed graph, with each edge pointing in the direction of increasing kNN density. A local minimum, highlighted in pink, is defined as a vertex that has lower kNN than all its neighbors. Finally, the state associated with a local minimum is defined as the set of vertices that have uniquely shortest directed graph distance to that minimum. Non-minima vertices with equal graph distances to multiple local minima are unassociated with any state (grey).

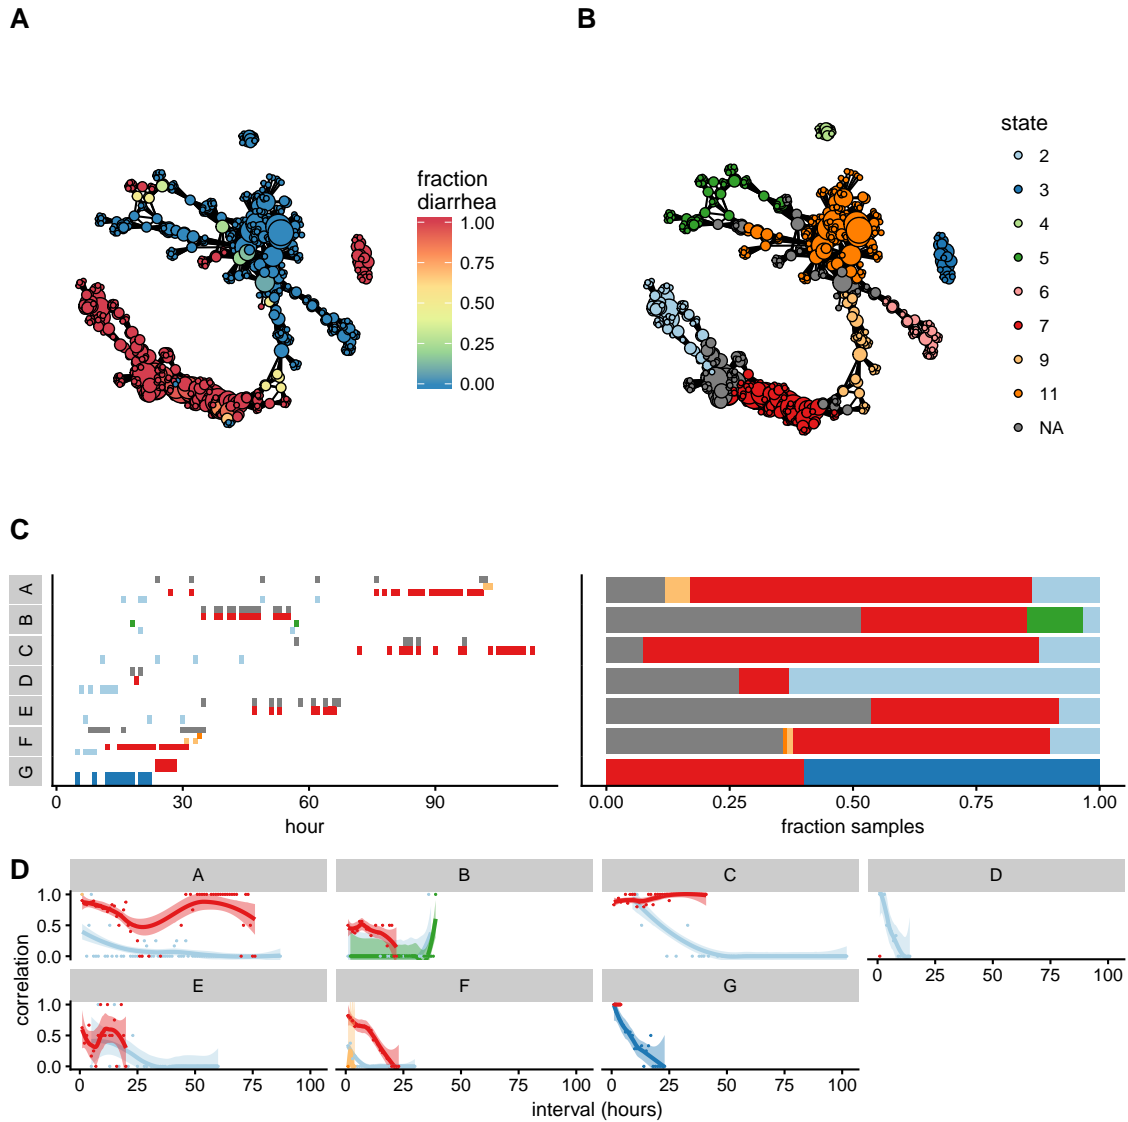

Figure 2: The phase space of the cholera gut microbiome. A. Mapper representation of the combined cholera data reveals disease- and healthy-associated neighborhoods of the phase space. Color: fraction of samples in each vertex associated with diarrhea. Connected components of the Mapper graph representing only one sample are not shown. Disjoint regions of phase space are represented as separate connected components. B. Partitioning of the phase space into metastable states. Vertices unassigned to any state are colored in grey. C. Left: progression of subject compositions during the diarrhea phase by state, showing persistence of states over time. Y axis and color indicate state index, with color indexing as in B. Where a sample was associated with multiple states, all were included. Right: frequency of samples associated with each states during the diarrhea phase for each subject with colors as in B. D. Temporal correlation function for the diarrhea phase of each subject. Lines: smoothed empirical mean; ribbons: standard error of the mean. Values outside the range of  $0 \leq y \leq 1$  omitted.

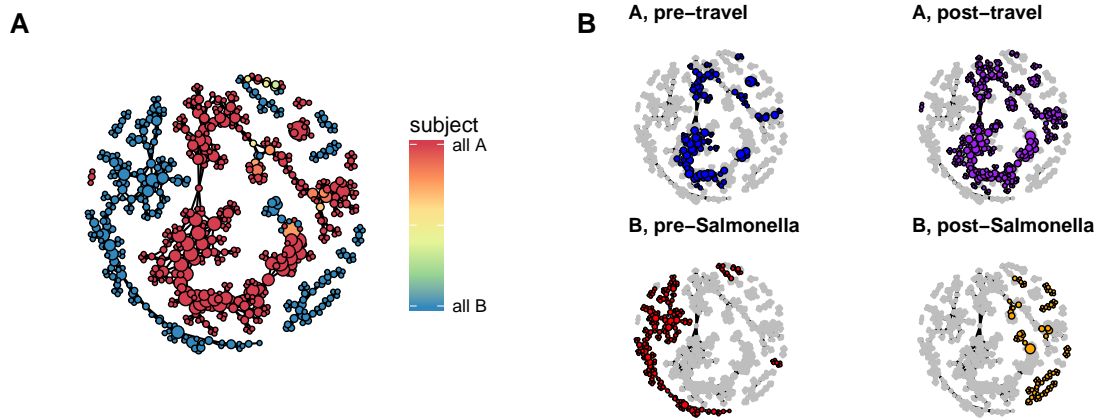

Figure 3: The phase space of two healthy adult male gut microbiomes. A. Mapper representation of the combined daily time series of two healthy adult human gut microbiomes. Connected components of the Mapper graph representing only one sample are not shown. B. Regions of phase space occupied by each subject before after perturbation.

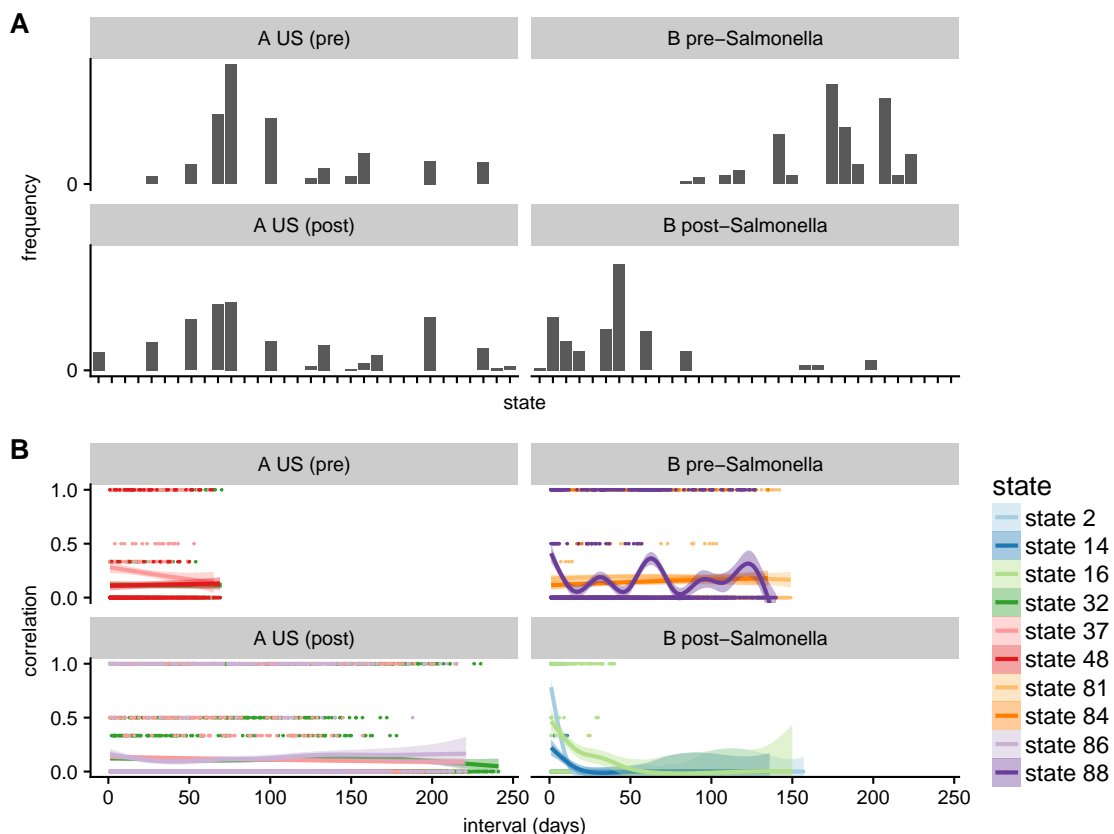

Figure 4: States and dynamics of two healthy adult male gut microbiomes. A. Frequency of states for healthy periods before and after perturbation. X axis: state index. Y axis: frequency of samples. B. Temporal correlation functions for the three most probable states during each event in the 'healthy' phases of each subject. Lines: smoothed empirical mean; ribbons: standard error of the mean.



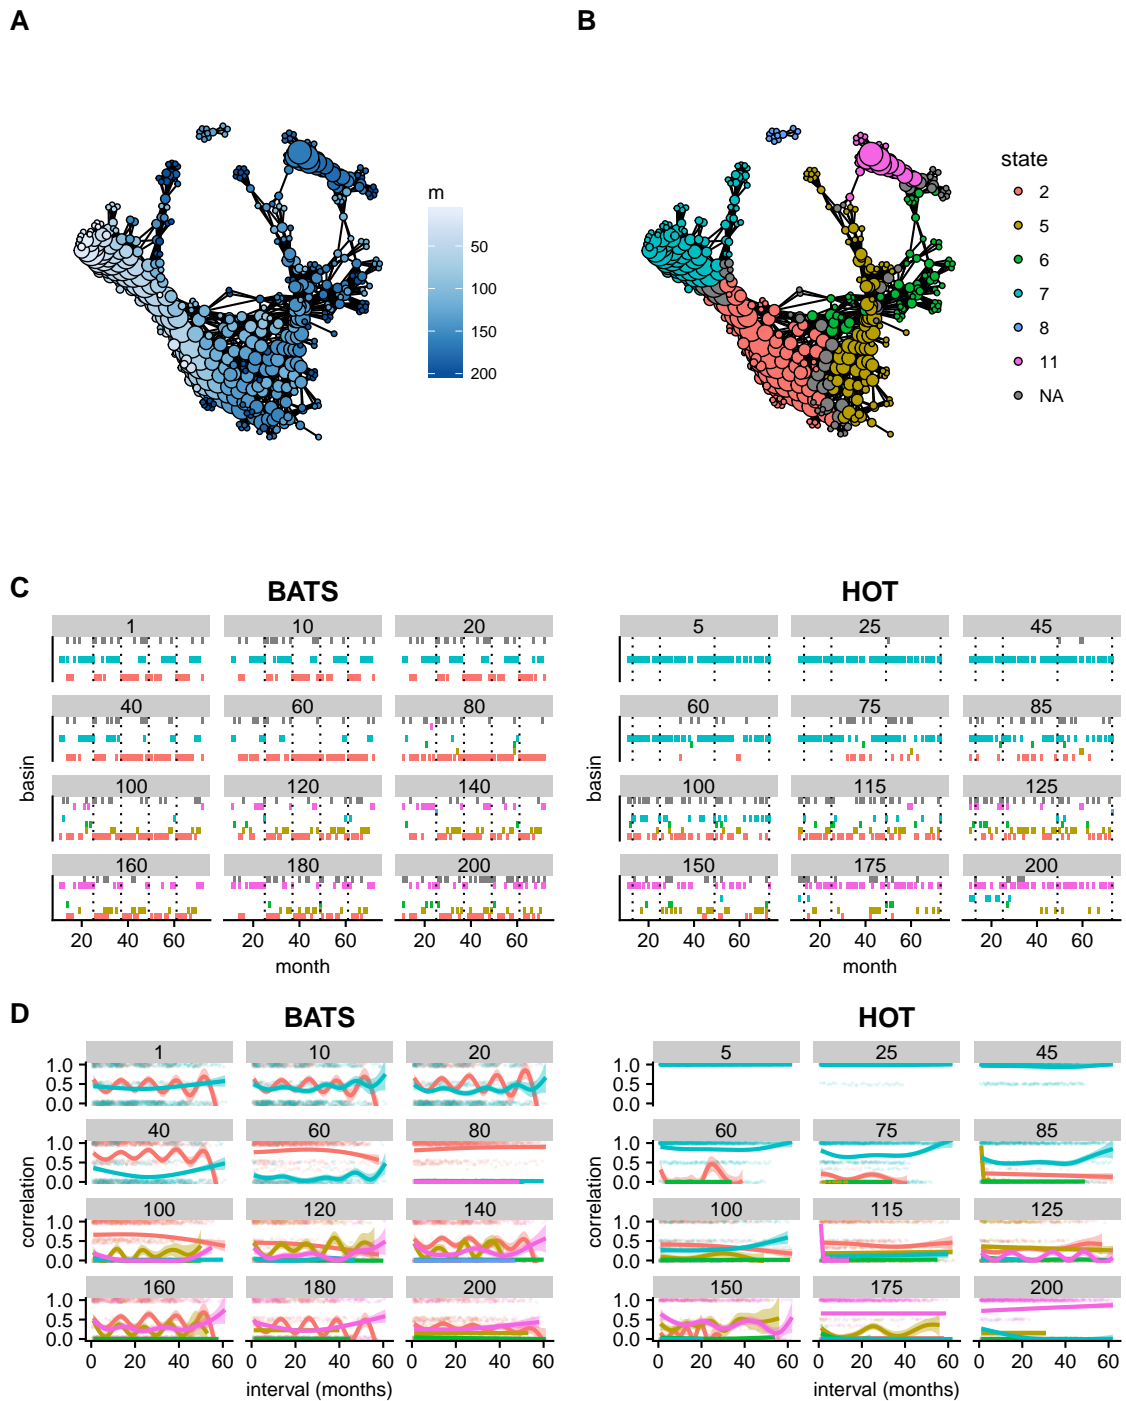

Figure 5: The landscape of *Prochlorococcus* communities. The combined phase space of two *Prochlorococcus* communities inhabiting the Atlantic and Pacific Oceans, respectively. Connected components of the Mapper graph representing only one sample are not shown. A. Vertices colored by mean depth in meters of represented samples. B. Partitioning of the phase space into states. C. Successions of states for each site-depth fraction combination. Dotted lines indicate samples during January. Colors indicate states as in B. D. Temporal correlation functions for each state per site-depth fraction combination.

## 602 Tables

| Data set                | # intervals for (rank(PCo1), rank(PCo2)) | % overlap | # bins |
|-------------------------|------------------------------------------|-----------|--------|
| Cholera                 | (15, 15)                                 | 70        | 10     |
| Two healthy adult males | (30, 30)                                 | 50        | 10     |
| <i>Prochlorococcus</i>  | (20, 20)                                 | 60        | 10     |

Table 1: Hyperparameters used to generate the Mapper representation of each data set.

## 603 Additional Files

### 604 Supplementary information

605 Supplementary figures showing the results of the data rarefaction test. Supplementary figure  
606 showing the temperature gradients across the *Prochlorococcus* phase space.
